# Supplementary material
Source: Springer Nature journal article supplement (https://www.springermedizin.de/resource/supplementary/13063_2009_375_MOESM1_ESM.pdf/9618096)
Supplement: MOESM1 [file 9618096]

Assessed for eligibility (from  
3 comprehensive care clincs:

- -Adult ( $\geq 18$  yrs)
- -Initiating HAART
- -Have cell phone  
access

Exclusion criteria

- Not meeting inclusion  
criteria
- Not intending to attend  
clinic for 2 yrs
- Unable to perform SMS at  
enrollment

*Target Enrolment n=494  
(Assuming attrition of 10%,  
target at least n=533)*

**Enrollment**

Randomized

Allocated to intervention (SMS)

- Receive weekly SMS slogan
- Expected to respond within 48  
hours
- Clinician to triage response
- Non-responders called

Baseline data collection:

- Baseline questionnaires
- Clinical assessment
- SF-12
- Baseline CD4 count and  
plasma HIV viral load

Follow-up (6 and 12 months)

- Follow-up questionnaires
- Clinical assessment
- SF-12
- CD4 count and plasma HIV  
viral load

**Allocation**

Allocated to control (SOC)

- Receive standard of care  
(SOC)
- No weekly SMS
- May call on own initiative

Baseline data collection:

- Baseline questionnaires
- Clinical assessment
- SF-12
- Baseline CD4 count and  
plasma HIV viral load

Follow-up (6 and 12 months)

- Follow-up questionnaires
- Clinical assessment
- SF-12
- CD4 count and plasma HIV  
viral load

**Baseline  
Assessment**

**Follow-up**
